# Supplementary material for: Towards the establishment of an environmental quality standard for aluminium in surface waters
Source: Royal Society of Chemistry journal article supplement (doi:10.1039/b717812c), 2008-01-01
Supplement: b717812c.pdf [file b717812c.pdf]

## APPENDIX A TABLE OF SAMPLING SITES AND SURVEY RESULT

### Sample sites

| Sample No. | Location                         | NGR      | Sample No. | Location                           | NGR      |
|------------|----------------------------------|----------|------------|------------------------------------|----------|
| 108        | filtered real sample             | SX608749 | 143        | River Anton, Fullerton             | SU279395 |
| 109        | filtered real sample             | SX608749 | 144        | River Test, Longstock channel 1    | SU363368 |
| 110        | Burbage Brook, Ringinglow        | SK260830 | 145        | River Test, Longstock channel 2    | SU361368 |
| 111        | Highlow Brook, Hathersage        | SK233815 | 146        | Pillhill Brook, Anna Valley        | SU333437 |
| 112        | River Derwent, Hathersage        | SK183805 | 147        | River Test, Long Parish            | SU441449 |
| 113        | River Derwent, confl. Burbage Bk | SK242784 | 148        | River Thames, Kemble               | ST998973 |
| 114        | River Noe, Brough                | SK184824 | 149        | Canal, South Cerney                | SU749970 |
| 115        | River Noe, Hope                  | SK172837 | 150        | River Churn, Cerney Wick           | SU076958 |
| 116        | River Dove, Crowdicote           | SK100652 | 151        | River Ray, Purton                  | SU110901 |
| 117        | River Manifold, Longnor br1      | SK088646 | 152        | River Cole, Inglesham              | SU210979 |
| 118        | River Manifold, Longnor br2      | SK088647 | 153        | River Leach, Lechlade              | SU226989 |
| 119        | River Manifold, Hulme End        | SK105593 | 154        | Stream, Kelmscot                   | SU265990 |
| 120        | R Dove, Hartington               | SK359800 | 155        | River Thames, Radcot               | SU285993 |
| 121        | R Dove, Hartington               | SK359800 | 156        | River Windrush, Northmoor          | SP404029 |
| 122        | R Hamps, Onecote                 | SK050552 | 157        | River Ock, Abingdon                | SU496967 |
| 123        | River Tean Huntley               | SK005412 | 158        | River Thames, Abingdon             | SU496967 |
| 124        | River Tean Teanford              | SK005404 | 159        | River Ock, Abingdon                | SU496967 |
| 126        | Newleycombe Brook, Burrator      | SX569960 | 160        | Winterbrook, Cholsey               | SU605887 |
| 127        | River Till, Tilshead             | ST038470 | 161        | Winterbrook, u/s stw South Moreton | SU560880 |
| 128        | River Lymington, Balmer Lawn     | SU313031 | 162        | River Lambourn Gt Shefford         | SU383751 |
| 129        | River Avon Water, A337           | SU305941 | 163        | River Lambourn Gt Shefford         | SU383751 |
| 130        | River Lymington, Balmer Lawn     | SU313031 | 164        | River Kennet, Gt Bedwyn            | SU305678 |
| 131        | River Avon Water, Wainsford      | SU299950 | 165        | River Kennet, West Overton         | SU128682 |
| 132        | River Lymington, Boldre          | SZ328964 | 166        | Horner Water, West Luccombe        | SS899463 |
| 133        | Brook, Crockford Br.             | SZ351990 | 167        | Weir Water, Robbers Birdge         | SS822463 |
| 134        | Hatchet Pond, Nr outflow         | SU363013 | 168        | Chalk Water, Nr Oare               | SS815463 |
| 135        | Hatchet Pond, Nr inflow          | SU369107 | 169        | Badgworthy Brook, Malmsmead        | SS793478 |
| 136        | River Beaulieu, Beaulieu         | SU380038 | 170        | River East Lyn, Brendon            | SS769483 |
| 137        | River Beaulieu,                  | SU387053 | 171        | River Exe, Nr Exe Head             | SS764416 |

Supplementary Material (ESI) for Journal of Environmental Monitoring  
This journal is © The Royal Society of Chemistry 2008

|     |                                     |          |     |                           |          |
|-----|-------------------------------------|----------|-----|---------------------------|----------|
| 138 | River Beaulieu,                     | SU380068 | 172 | River Exe, Nr Exe Head    | SS764417 |
| 139 | Brook, Shipton Br.                  | SU370045 | 173 | River Barle, Simonsbath   | SS772391 |
| 140 | River Blackwater, Sherfield English | SU294224 | 174 | Kinsford Water, Nr source | SS744371 |
| 175 | White Water, Clovenrocks Bridge     | SS786398 | 177 | Brook, Edgecote           | SS847387 |
| 176 | River Exe, Nr Downscombe            | SS843391 | 178 | River Exe, Exford         | SS854388 |
| 179 | Penneycombe Water, Withypool        | SS847358 | 181 | Winn Brook, Winsford      | SS905349 |
| 180 | River Barle, Withypool              | SS846356 | 182 | River Exe, Winsford       | SS907348 |
|     |                                     |          |     |                           |          |

Supplementary Material (ESI) for Journal of Environmental Monitoring  
 This journal is © The Royal Society of Chemistry 2008

Survey Data

| Sample No. |                                  | Active aluminium (ug/l) | Dissolved aluminium (ug/l) | Total aluminium | Conductivity $\mu$ S/cm | Lab. pH | Alkalinity (mg CaCO <sub>3</sub> /l) | Total Hardness (mg/l) | Dissolved organic carbon (mg/l) | Field pH |
|------------|----------------------------------|-------------------------|----------------------------|-----------------|-------------------------|---------|--------------------------------------|-----------------------|---------------------------------|----------|
| 108        | filtered real sample             | 51                      | 64.5                       | 87              | 43                      | 5.7     | 0.12                                 | 5.5                   | 2.9                             | 5.64     |
| 109        | filtered real sample             | 57.3                    | 78.1                       | 104             | 44                      | 5.7     | 1.2                                  | 6                     | 1.1                             | 5.68     |
| 110        | Burbage Brook, Ringinglow        | 110                     | 216                        | 237             | 81                      | 4       | 0                                    | 4.69                  | 19.1                            | 3.97     |
| 111        | Highlow Brook, Hathersage        | 19                      | 26.6                       | 139             | 147                     | 7.6     | 25.4                                 | 50.3                  | 3.05                            | 7.71     |
| 112        | River Derwent, Hathersage        | 36.8                    | 69.5                       | 342             | 188                     | 7.61    | 46.5                                 | 69.8                  | 4.86                            | 7.72     |
| 113        | River Derwent, confl. Burbage Bk | 40.2                    | 101                        | 330             | 156                     | 7.32    | 35.9                                 | 56.8                  | 8.07                            | 7.33     |
| 114        | River Noe, Brough                | 23.5                    | 31                         | 310             | 381                     | 7.89    | 131                                  | 167                   | 3.32                            | 7.91     |
| 115        | River Noe, Hope                  | 20.7                    | 28.7                       | 332             | 385                     | 7.91    | 132                                  | 166                   | 3.2                             | 7.85     |
| 116        | River Dove, Crowdicote           | 23.5                    | 41.3                       | 198             | 254                     | 7.7     | 80.5                                 | 93.5                  | 4.36                            | 7.72     |
| 117        | River Manifold, Longnor br1      | 30.7                    | 85.6                       | 230             | 124                     | 7.06    | 16.4                                 | 33                    | 6.51                            | 7.15     |
| 118        | River Manifold, Longnor br2      | 31.1                    | 90.6                       | 280             | 123                     | 7.06    | 16.2                                 | 33.9                  | 6.59                            | 7.19     |
| 119        | River Manifold, Hulme End        | 27.6                    | 86.1                       | 467             | 121                     | 7.22    | 22.2                                 | 37                    | 7.37                            | 7.29     |
| 120        | R Dove, Hartington               | 18.2                    | 30.5                       | 527             | 313                     | 7.78    | 109                                  | 131                   | 4.02                            | 7.68     |
| 121        | R Dove, Hartington               | 18                      | 29.4                       | 346             | 313                     | 7.74    | 107                                  | 129                   | 3.86                            | 7.68     |
| 122        | R Hamps, Onecote                 | 29.2                    | 58.7                       | 429             | 283                     | 7.95    | 104                                  | 135                   | 6.49                            | 8.05     |
| 123        | River Tean Huntley               | 22                      | 52.7                       | 605             | 336                     | 7.6     | 89.5                                 | 131                   | 6.63                            | 7.57     |
| 124        | River Tean Teanford              | 24.7                    | 65.7                       | 568             | 340                     | 7.59    | 89.4                                 | 128                   | 6.84                            | 7.55     |
| 126        | Newleycombe Brook, Burrator      | 15.5                    | 26.7                       | 30.1            | 58                      | 6.33    | 3.09                                 | 6.43                  | 1.14                            | 6.35     |
| 127        | River Till, Tilshead             | 12.1                    | 10                         | 10              | 628                     | 7.53    | 240                                  | 291                   | 1.57                            | 7.51     |
| 128        | River Lymington, Balmer Lawn     | 33.8                    | 111                        | 327             | 167                     | 6.77    | 14.7                                 | 35.1                  | 7.03                            | 6.68     |
| 129        | River Avon Water, A337           | 19.2                    | 57                         | 398             | 292                     | 7.5     | 49.4                                 | 79.2                  | 6.26                            | 7.42     |

Supplementary Material (ESI) for Journal of Environmental Monitoring  
 This journal is © The Royal Society of Chemistry 2008

|     |                                     |      |      |      |      |      |      |      |      |      |
|-----|-------------------------------------|------|------|------|------|------|------|------|------|------|
| 130 | River Lymington, Balmer Lawn        | 35.5 | 110  | 334  | 284  | 6.8  | 14.7 | 34.8 | 7.28 | 6.68 |
| 131 | River Avon Water, Wainsford         | 19.2 | 57.5 | 382  | 292  | 7.48 | 47.9 | 77.7 | 6.33 | 7.4  |
| 132 | River Lymington, Boldre             | 28.6 | 99.9 | 378  | 207  | 7.05 | 22.9 | 48.3 | 7.94 | 6.94 |
| 133 | Brook, Crockford Br.                | 15.6 | 32.1 | 83.1 | 122  | 6.84 | 8.52 | 25.3 | 3.85 | 6.78 |
| 134 | Hatchet Pond, Nr outflow            | 25.5 | 72.5 | 225  | 148  | 6.56 | 11.4 | 28.5 | 6.39 | 6.42 |
| 135 | Hatchet Pond, Nr inflow             | 20.2 | 48.6 | 145  | 134  | 6.69 | 9.87 | 27.1 | 5.28 | 6.71 |
| 136 | River Beaulieu, Beaulieu            | 38.2 | 128  | 319  | 303  | 7    | 26.9 | 52.9 | 10.6 | 6.81 |
| 137 | River Beaulieu,                     | 35.4 | 119  | 267  | 210  | 7.04 | 34   | 59.5 | 9.72 | 6.89 |
| 138 | River Beaulieu,                     | 35.1 | 117  | 290  | 221  | 7.04 | 34.4 | 60.3 | 10.2 | 6.87 |
| 139 | Brook, Sipton Br.                   | 55.5 | 138  | 333  | 172  | 6.33 | 8.76 | 25.5 | 9.68 | 6.13 |
| 140 | River Blackwater, Sherfield English | 27.2 | 73.8 | 492  | 316  | 7.26 | 48.6 | 100  | 5.86 | 7.15 |
| 143 | River Anton, Fullerton              | 13.8 | 10   | 10   | 613  | 8.04 | 233  | 288  | 1.98 | 7.87 |
| 144 | River Test, Longstock channel 1     | 10.9 | 10   | 4.89 | 597  | 8.08 | 238  | 272  | 1.86 | 7.89 |
| 145 | River Test, Longstock channel 2     | 8.98 | 10   | 5.67 | 598  | 8.1  | 233  | 267  | 1.67 | 7.9  |
| 146 | Pillhill Brook, Anna Valley         | 7.01 | 10   | 4.54 | 612  | 8.09 | 231  | 274  | 1.93 | 7.86 |
| 147 | River Test, Long Parish             | 6.27 | 10   | 3.25 | 530  | 7.94 | 218  | 244  | 1.77 | 7.88 |
| 148 | River Thames, Kemble                | 13   | 10   | 10   | 620  | 7.4  | 215  | 289  | 0.69 | 7.57 |
| 149 | Canal, South Cerney                 | 14.6 | 10   | 11.4 | 578  | 7.78 | 219  | 265  | 2.15 | 8.05 |
| 150 | River Churn, Cerney Wick            | 10.3 | 10   | 20   | 538  | 7.95 | 192  | 248  | 0.96 | 8.34 |
| 151 | River Ray, Purton                   | 9.88 | 10   | 27   | 1057 | 7.62 | 259  | 340  | 4.6  | 7.81 |
| 152 | River Cole, Inglesham               | 9.18 | 10   | 33.7 | 781  | 8.03 | 246  | 328  | 3.08 | 8.49 |
| 153 | River Leach, Lechlade               | 8.54 | 10   | 10.7 | 629  | 7.97 | 228  | 299  | 0.99 | 8.29 |
| 154 | Stream, Kelmscot                    | 8.82 | 10   | 40.1 | 700  | 7.98 | 259  | 336  | 1.31 | 8.29 |
| 155 | River Thames, Radcot                | 7.86 | 10   | 28.1 | 660  | 7.95 | 222  | 288  | 2.39 | 8.3  |
| 156 | River Windrush, Northmoor           | 8.52 | 10   | 45.9 | 615  | 7.94 | 211  | 280  | 1.95 | 8.27 |
| 157 | River Ock, Abingdon                 | 8.42 | 10   | 34.8 | 795  | 8.03 | 259  | 351  | 3.83 | 8.41 |
| 158 | River Thames, Abingdon              | 8.12 | 10   | 45.7 | 670  | 8.01 | 222  | 299  | 2.46 | 8.3  |
| 159 | River Ock, Abingdon                 | 8.37 | 10   | 46.2 | 795  | 8.05 | 261  | 362  | 3.41 | 8.4  |
| 160 | Winterbrook, Cholsey                | 8.63 | 10   | 14.3 | 790  | 7.9  | 275  | 378  | 3.02 | 8.1  |
| 161 | Winterbrook, u/s stw South Moreton  | 9.8  | 10   | 15.1 | 747  | 8.02 | 251  | 352  | 2.39 | 8.3  |
| 162 | River Lambourn Gt Shefford          | 10.3 | 10   | 10   | 568  | 7.87 | 214  | 269  | 1.2  | 7.86 |
| 163 | River Lambourn Gt Shefford          | 7.45 | 10   | 10   | 568  | 7.86 | 209  | 267  | 1.41 | 7.86 |
| 164 | River Kennet, Gt Bedwyn             | 8    | 10   | 12.4 | 616  | 7.93 | 245  | 301  | 1.35 | 8.07 |
| 165 | River Kennet, West Overton          | 8.39 | 10   | 12.6 | 700  | 7.82 | 270  | 337  | 1.97 | 7.78 |
| 166 | Horner Water, West Luccombe         | 8.41 | 7.93 | 11.7 | 120  | 7.41 | 25.9 | 34   | 0.74 | 7.75 |

Supplementary Material (ESI) for Journal of Environmental Monitoring  
 This journal is © The Royal Society of Chemistry 2008

|     |                                 |      |      |      |     |      |       |      |      |      |
|-----|---------------------------------|------|------|------|-----|------|-------|------|------|------|
| 167 | Weir Water, Robbers Birdge      | 12.4 | 13.2 | 21.1 | 111 | 7.43 | 24.7  | 29.6 | 0.53 | 7.51 |
| 168 | Chalk Water, Nr Oare            | 13.6 | 16.5 | 19.6 | 97  | 7.43 | 25.9  | 28.7 | 1.36 | 7.6  |
| 169 | Badgworthy Brook, Malmsmead     | 9.07 | 10.1 | 11.9 | 94  | 7.49 | 24.4  | 27.6 | 0.99 | 7.76 |
| 170 | River East Lyn, Brendon         | 10.6 | 11.1 | 14   | 110 | 7.55 | 28.1  | 33.2 | 1.06 | 7.8  |
| 171 | River Exe, Nr Exe Head          | 11.4 | 35.4 | 52.9 | 48  | 6.04 | 3.91  | 8.3  | 1.45 | 6.2  |
| 172 | River Exe, Nr Exe Head          | 13.4 | 35.2 | 47.3 | 48  | 6.02 | 3.85  | 8.3  | 1.45 | 6.2  |
| 173 | River Barle, Simonsbath         | 15.6 | 22   | 28.3 | 79  | 7.21 | 14.1  | 20.9 | 1.31 | 7.57 |
| 174 | Kinsford Water, Nr source       | 25.9 | 63.6 | 90.6 | 48  | 5.94 | 2.94  | 7    | 2.13 | 6.2  |
| 175 | White Water, Clovenrocks Bridge | 4.82 | 10   | 19.1 | 87  | 6.48 | 11.45 | 25.6 | 1    | 6.5  |
| 176 | River Exe, Nr Downscombe        | 12.4 | 14.1 | 18.7 | 81  | 7.11 | 14    | 21.1 | 1.2  | 7.2  |
| 177 | Brook, Edgecote                 | 11   | 12.7 | 19   | 82  | 7.18 | 15.2  | 22.5 | 1.42 | 7.3  |
| 178 | River Exe, Exford               | 8.32 | 10   | 12   | 142 | 7.52 | 13.6  | 45.6 | 0.9  | 7.6  |
| 179 | Penneycombe Water, Withypool    | 10.7 | 10   | 14.7 | 106 | 7.39 | 24    | 33.6 | 1.12 | 7.6  |
| 180 | River Barle, Withypool          | 10.8 | 13.8 | 20.7 | 81  | 6.91 | 13.2  | 20.2 | 1.26 | 7.3  |
| 181 | Winn Brook, Winsford            | 8.94 | 10.4 | 31.9 | 104 | 7.21 | 16.4  | 29.1 | 1.31 | 7.3  |
| 182 | River Exe, Winsford             | 12.6 | 13.7 | 15.4 | 114 | 7.48 | 23.1  | 34.4 | 1.22 | 7.5  |
